# Supplementary material for: Sugar Levels Determine Fermentation Dynamics during Yeast Pastry Making and Its Impact on Dough and Product Characteristics
Source: MDPI journal article supplement (doi:10.3390/foods11101388), 2022-05-11
Supplement: s1 [file s1]

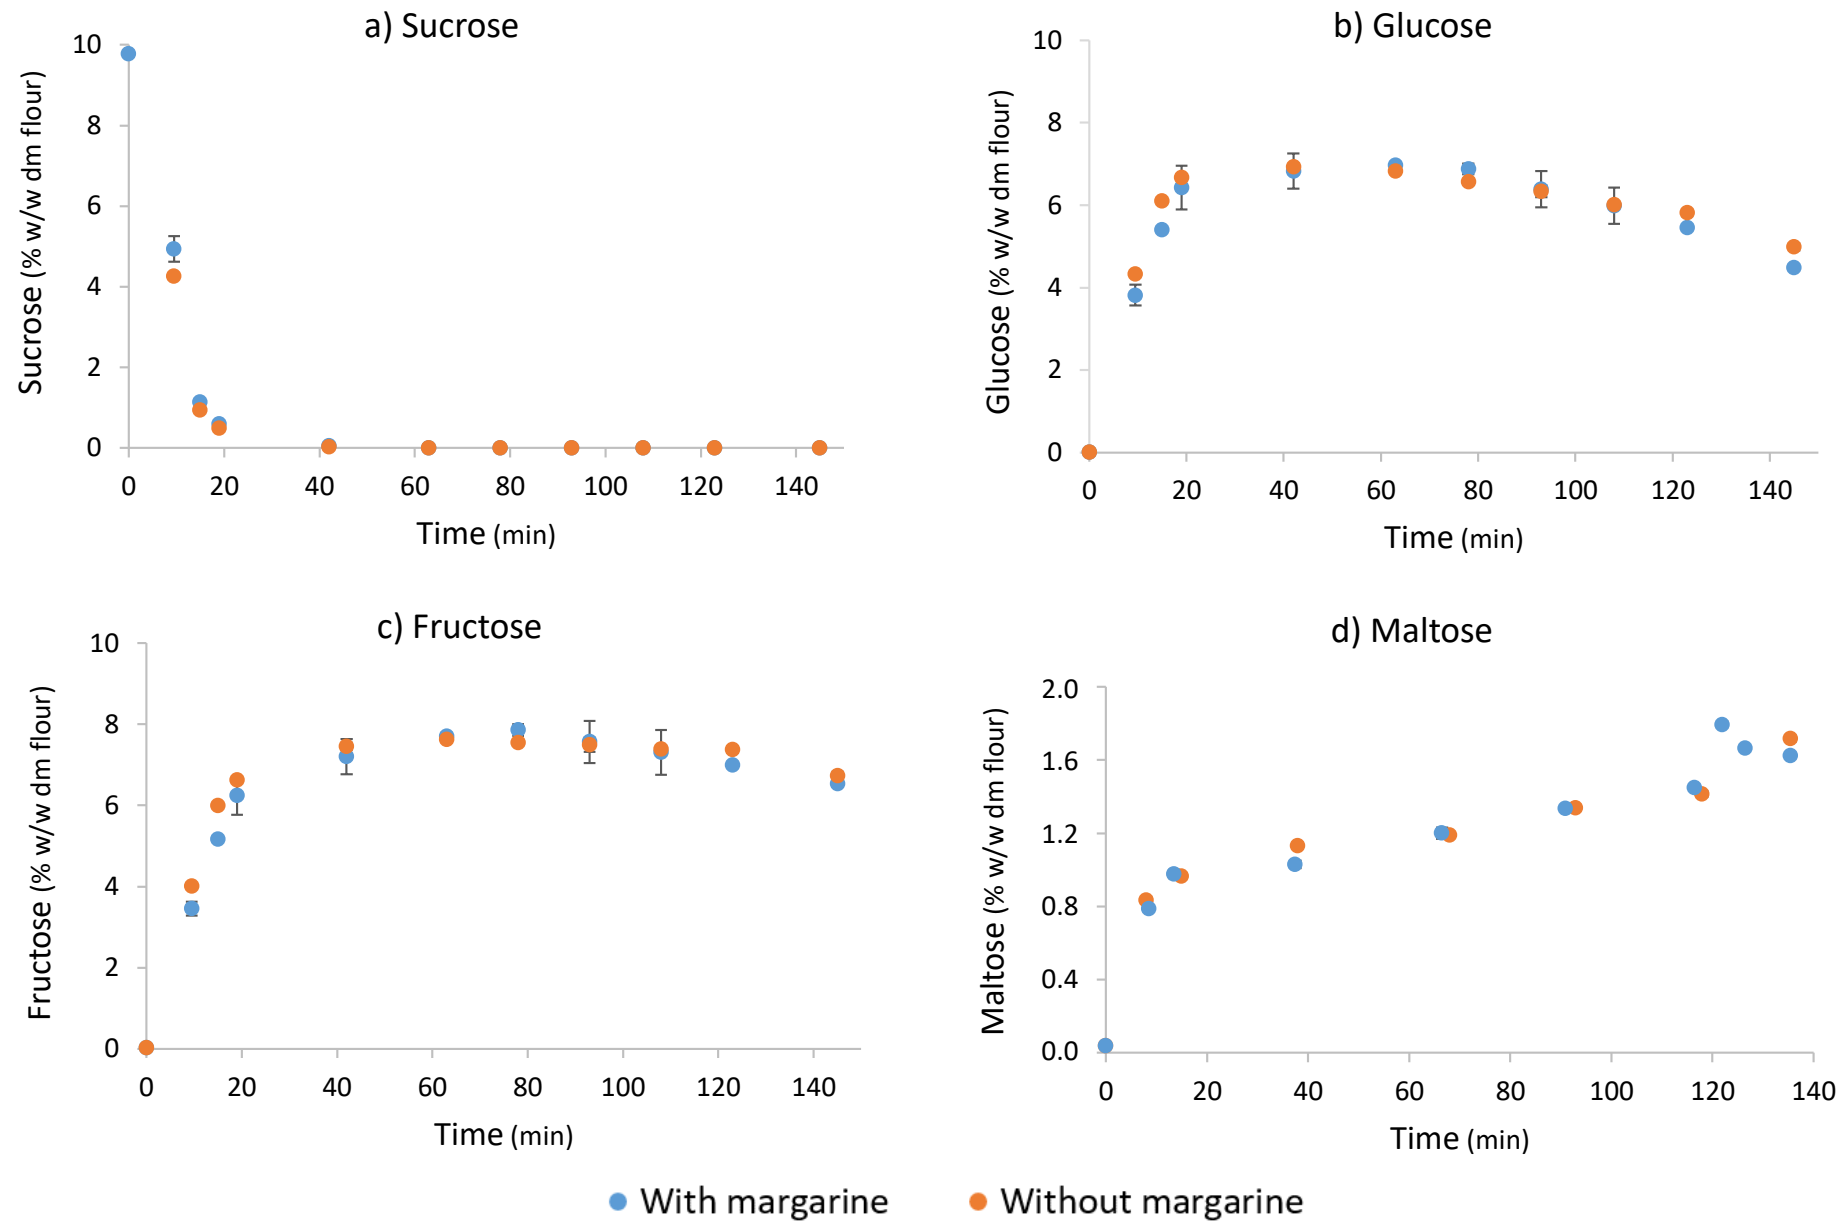

**Figure S1:** Evolution of (a) sucrose, (b) glucose, (c) fructose, and (d) maltose concentrations in pastry samples with 8% yeast and with or without margarine as a function of time (min) during pastry production. Concentrations are expressed on flour dry matter base (% w/w dm flour). The start of mixing is defined as  $t = 0$ . Vertical bars represent standard deviations of duplicate measurements.
